# Supplementary material for: Recapitulation of Neuropsychiatric Behavioral Features in Mice Using Acute Low-dose MK-801 Administration
Source: PubMed Central journal article supplement — Exp Neurobiol. 2019 Dec 31;28(6):697–708. doi: 10.5607/en.2019.28.6.697 (PMC6946115; doi:10.5607/en.2019.28.6.697), 2019-12-31
Supplement: en-28-697_supple.pdf [file en-28-697_supple.pdf]

**Supplementary Table 1.** Behavioral aberrations induced by acute administration of MK-801 at low-range doses

|                                   | Vehicle        |                |           | MK-801                  |           |                          |              |                          |              |                         |              |                         |         |
|-----------------------------------|----------------|----------------|-----------|-------------------------|-----------|--------------------------|--------------|--------------------------|--------------|-------------------------|--------------|-------------------------|---------|
|                                   |                |                |           | 0.1 mg kg <sup>-1</sup> |           | 0.12 mg kg <sup>-1</sup> |              | 0.15 mg kg <sup>-1</sup> |              | 0.2 mg kg <sup>-1</sup> |              | 0.3 mg kg <sup>-1</sup> |         |
|                                   | Mean ± SEM     | Mean ± SEM     | P value   | Mean ± SEM              | P value   | Mean ± SEM               | P value      | Mean ± SEM               | P value      | Mean ± SEM              | P value      | Mean ± SEM              | P value |
| <b>Open field test</b>            |                |                |           |                         |           |                          |              |                          |              |                         |              |                         |         |
| Distance moved (cm)               | 7652 ± 451.6   | 10491 ± 395.9  | 0.0766    | 12258 ± 872.3           | 0.0003*** | 14089 ± 980.2            | < 0.0001**** | 13506 ± 602.7            | < 0.0001**** | 12298 ± 964.0           | 0.0011**     |                         |         |
| <b>Y-maze</b>                     |                |                |           |                         |           |                          |              |                          |              |                         |              |                         |         |
| Total arm entries                 | 42.65 ± 1.336  | 53.20 ± 3.210  | 0.1496    | 58.93 ± 5.228           | 0.0009*** | 70.87 ± 5.093            | < 0.0001**** | 67.90 ± 3.384            | < 0.0001**** | 66.75 ± 4.228           | < 0.0001**** |                         |         |
| Spontaneous alternation (%)       | 64.81 ± 1.818  | 47.81 ± 1.829  | 0.0004*** | 50.10 ± 3.093           | 0.0005*** | 47.29 ± 1.856            | < 0.0001**** | 48.35 ± 2.262            | 0.0008***    | 43.04 ± 3.166           | < 0.0001**** |                         |         |
| <b>Cliff avoidance test</b>       |                |                |           |                         |           |                          |              |                          |              |                         |              |                         |         |
| Jumping latency (s)               | 1195 ± 5.000   | 1006 ± 114.6   | 0.7045    | 720.0 ± 135.7           | 0.0315*   | 999.3 ± 99.38            | 0.6753       | 678.8 ± 157.9            | 0.0168*      | 334.2 ± 146.2           | < 0.0001**** |                         |         |
| <b>Self-grooming</b>              |                |                |           |                         |           |                          |              |                          |              |                         |              |                         |         |
| Self-grooming time (s)            | 140.6 ± 17.72  | 174.1 ± 16.27  | 0.5657    | 159.0 ± 14.01           | 0.9437    | 105.1 ± 15.69            | 0.5181       | 71.43 ± 12.52            | 0.0146*      | 37.79 ± 7.457           | < 0.0001**** |                         |         |
| <b>Three chamber social assay</b> |                |                |           |                         |           |                          |              |                          |              |                         |              |                         |         |
| Social novelty index              | 2.236 ± 0.2606 | 1.980 ± 0.1910 | 0.9015    | 1.419 ± 0.1262          | 0.0445*   | 1.422 ± 0.1597           | 0.0418*      | 1.749 ± 0.2417           | 0.4348       |                         |              |                         |         |
| Social preference index           | 1.876 ± 0.2033 | 1.415 ± 0.1749 | 0.5222    | 1.146 ± 0.1900          | 0.0977    | 1.223 ± 0.1684           | 0.1734       | 1.320 ± 0.2518           | 0.3300       |                         |              |                         |         |

**Supplementary Table 1. Behavioral aberrations induced by acute administration of MK-801 at low-range doses.** MK-801, an NMDA antagonist, recapitulates a wide spectrum of neuropsychiatric symptoms. Listed above are the aberrant behaviors evoked by acute administration of low-dose MK-801 in this study.

**Supplementary Table 2. Overview of the behavioral impairments induced by MK-801**

| Behavioral aberration        | Current study                                                                                                                                                               | Published studies and references                                                                                                                                                                                                                                                                                                                                                                                                                                                                                                                                                                                                                                                                                                                                                                                                                                          |
|------------------------------|-----------------------------------------------------------------------------------------------------------------------------------------------------------------------------|---------------------------------------------------------------------------------------------------------------------------------------------------------------------------------------------------------------------------------------------------------------------------------------------------------------------------------------------------------------------------------------------------------------------------------------------------------------------------------------------------------------------------------------------------------------------------------------------------------------------------------------------------------------------------------------------------------------------------------------------------------------------------------------------------------------------------------------------------------------------------|
| <i>Hyperlocomotion</i>       | Measured through open field test, increased distance moved at doses 0.12 to 0.3 mg kg <sup>-1</sup> , with possible initial stereotypic episodes at 0.3 mg kg <sup>-1</sup> | <p>At doses above 0.3 mg kg<sup>-1</sup> (used 0.02, 0.05, 0.15, 0.3, 0.6 mg kg<sup>-1</sup>), hyperlocomotion only developed after the stereotypic phase in male C57BL/6 mice at 6 weeks measured through beam crossing [1]</p> <p>Increase in locomotor activity was induced in CD-1 mice at 0.5 mg kg<sup>-1</sup> of MK-801 in a two-hour observation of horizontal counts. BALB/c and C57BL/6 mice, however, demonstrated increases in horizontal counts at 0.32 mg kg<sup>-1</sup> [2]</p> <p>“Popping,” or irregular episodes of intense jumping behavior, was observed in the Balb/c mouse strain when administered with 0.56 mg kg<sup>-1</sup> of MK-801 [3]</p> <p>Hyperactive locomotor activity at a significantly higher dose of MK-801 at 0.6 mg kg<sup>-1</sup> in male Swiss mice, peaking in between 25 min and 35 min in a 195-min observation [4]</p> |
| <i>Cognitive dysfunction</i> | Measured through Y-maze, decreased spontaneous alternation at 0.1 mg kg <sup>-1</sup> without affecting total number of arm entries                                         | <p>Impairment in the spontaneous alteration of male C57BL/6J mice at 0.07 and 0.1 mg kg<sup>-1</sup>, administered subcutaneously, during T-maze continuous alternation task [5]</p> <p>Impaired spatial memory acquisition and reversal learning in C67BL/6J mice in water T-maze and disrupted memory context and cue during fear conditioning at doses 0.05 and 0.1 mg kg<sup>-1</sup> [6, 7]</p> <p>Amnesic effects of 0.1 and 0.15 mg kg<sup>-1</sup> doses of MK-801 in male Swiss mice during passive avoidance test [8]</p> <p>Impairment in episodic memory during passive avoidance learning required higher doses of MK-801 ranging from 0.16 to 0.5 mg kg<sup>-1</sup> in male CD-1 mice [9, 10]</p>                                                                                                                                                          |
| <i>Social dysfunction</i>    | Measured through three-chamber social assay, decreased social interaction at doses 0.12 and 0.15 mg kg <sup>-1</sup>                                                        | <p>Male C57BL/6J mice aged 4-5 weeks treated with 0.3 mg kg<sup>-1</sup> demonstrated impaired sociability and diminished social preference in groups treated with 0.2, 0.3, and 0.5 mg kg<sup>-1</sup> using the same behavioral assay performed in this study [11]</p> <p>Administration of 0.1 mg kg<sup>-1</sup> in male CD-1 mice the cumulative time the subject mice stayed with a companion mouse and the cumulative time spent investigating the tail/anogenital area of the</p>                                                                                                                                                                                                                                                                                                                                                                                 |

|                    |                                                                                                                                                                                                    |                                                                                                                                                           |
|--------------------|----------------------------------------------------------------------------------------------------------------------------------------------------------------------------------------------------|-----------------------------------------------------------------------------------------------------------------------------------------------------------|
|                    |                                                                                                                                                                                                    | companion mice [12]                                                                                                                                       |
| <i>Impulsivity</i> | Measured through cliff avoidance test, all groups displayed significant impairment of their cliff avoidance reaction and decreased jumping latency at doses 0.12, 0.2, and 0.3 mg kg <sup>-1</sup> | induced an increase in premature responding in 5-CSRT at 0.015 and 0.063 mg kg <sup>-1</sup> in Long Evans and Sprague-Dawley rats, respectively [13, 14] |

**Supplementary Table 2. Overview of the behavioral impairments induced by MK-801.** Listed above are the behavioral aberrations induced by MK-801 in our study and in others with the strains, age, and doses used.

1. Wu, J., et al., *Bimodal effects of MK-801 on locomotion and stereotypy in C57BL/6 mice*. *Psychopharmacology*, 2005. **177**(3): p. 256-263.
2. Kalinichev, M., et al., *Locomotor reactivity to a novel environment and sensitivity to MK-801 in five strains of mice*. *Behavioural pharmacology*, 2008. **19**(1): p. 71-75.
3. Deutsch, S.I., et al., *Inbred mouse strains differ in sensitivity to "popping" behavior elicited by MK-801*. *Pharmacology Biochemistry and Behavior*, 1997. **57**(1-2): p. 315-317.
4. Zuo, D.-Y., et al., *Effect of acute and chronic MK-801 administration on extracellular glutamate and ascorbic acid release in the prefrontal cortex of freely moving mice on line with open-field behavior*. *Life sciences*, 2006. **78**(19): p. 2172-2178.
5. van der Staay, F.J., et al., *Effects of the cognition impairer MK-801 on learning and memory in mice and rats*. *Behavioural brain research*, 2011. **220**(1): p. 215-229.
6. Csernansky, J.G., et al., *Cholinesterase inhibitors ameliorate behavioral deficits induced by MK-801 in mice*. *Neuropsychopharmacology*, 2005. **30**(12): p. 2135.
7. Bardgett, M.E., et al., *NMDA receptor blockade and hippocampal neuronal loss impair fear conditioning and position habit reversal in C57Bl/6 mice*. *Brain research bulletin*, 2003. **60**(1-2): p. 131-142.
8. Benvenga, M.J. and T.C. Spaulding, *Amnesic effect of the novel anticonvulsant MK-801*. *Pharmacology Biochemistry and Behavior*, 1988. **30**(1): p. 205-207.
9. Castellano, C., et al., *MK-801-induced disruptions of one-trial inhibitory avoidance are potentiated by stress and reversed by naltrexone*. *Neurobiology of Learning and Memory*, 1999. **72**(3): p. 215-229.
10. Venable, N. and P.H. Kelly, *Effects of NMDA receptor antagonists on passive avoidance learning and retrieval in rats and mice*. *Psychopharmacology*, 1990. **100**(2): p. 215-221.
11. Moy, S.S., et al., *Disruption of social approach by MK-801, amphetamine, and fluoxetine in adolescent C57BL/6J mice*. *Neurotoxicology and teratology*, 2013. **36**: p. 36-46.
12. Zou, H., et al., *Low dose MK-801 reduces social investigation in mice*. *Pharmacology Biochemistry and Behavior*, 2008. **90**(4): p. 753-757.
13. Paine, T.A., et al., *Sensitivity of the five-choice serial reaction time task to the effects of various psychotropic drugs in Sprague-Dawley rats*. *Biological psychiatry*, 2007. **62**(6): p. 687-693.
14. Fletcher, P.J., et al., *Impulsive action induced by amphetamine, cocaine and MK801 is reduced by 5-HT<sub>2C</sub> receptor stimulation and 5-HT<sub>2A</sub> receptor blockade*. *Neuropharmacology*, 2011. **61**(3): p. 468-477.
